# Supplementary material for: Data on endogenous chicken sperm peptides and small proteins obtained through Top-Down High Resolution Mass Spectrometry
Source: Data Brief. 2016 Aug 16;8:1421–5. doi: 10.1016/j.dib.2016.07.050 (PMC5007419; doi:10.1016/j.dib.2016.07.050)
Supplement: Supplementary file 1 — Supplementary material [file mmc1.pdf]

## Conflicts of Interest Statement

Manuscript title: DATA ON ENDOGENOUS CHICKEN SPERM PEPTIDES AND  
SMALL PROTEINS OBTAINED THROUGH TOP-DOWN HIGH RESOLUTION  
MASS SPECTROMETRY

The authors whose names are listed immediately below certify that they have NO affiliations with or involvement in any organization or entity with any financial interest (such as honoraria; educational grants; participation in speakers' bureaus; membership, employment, consultancies, stock ownership, or other equity interest; and expert testimony or patent-licensing arrangements), or non-financial interest (such as personal or professional relationships, affiliations, knowledge or beliefs) in the subject matter or materials discussed in this manuscript.

**Author names:**

L. SOLER  
V. LABAS  
A. THÉLIE  
A.P. TEIXEIRA - GOMES  
I. GRASSEAU  
L. BOUGUEREAU  
E. BUESBOIS

The authors whose names are listed immediately below report the following details of affiliation or involvement in an organization or entity with a financial or non-financial interest in the subject matter or materials discussed in this manuscript. Please specify the nature of the conflict on a separate sheet of paper if the space below is inadequate.

**Author names:**

This statement is signed by all the authors to indicate agreement that the above information is true and correct (a photocopy of this form may be used if there are more than 10 authors):

Author's name (typed)

Author's signature

Date

I. Grasseau

(I. Grasseau)

I. Grasseau

8/7/2016

A. Thélie

(A. Thélie)

A. Thélie

8/07/2016

E. Blesbois

(E. Blesbois)

E. Blesbois

8/07/2016

L. Soler

(L. Soler)

L. Soler

8/07/2016

V. Labas

(V. Labas)

V. Labas

8/07/2016

L. Bauguereau

(L. Bauguereau)

L. Bauguereau

8/07/2016

A.P. Teixeira-Gomes

(A.P. Teixeira-Gomes)

A.P. Teixeira-Gomes

8/07/2016

\_\_\_\_\_

\_\_\_\_\_

\_\_\_\_\_

\_\_\_\_\_

\_\_\_\_\_

\_\_\_\_\_

\_\_\_\_\_

\_\_\_\_\_

\_\_\_\_\_
